# Supplementary material for: Taxonomic revision of the Malagasy Aphaenogaster swammerdami group (Hymenoptera: Formicidae)
Source: PeerJ. 2021 Mar 2;9:e10900. doi: 10.7717/peerj.10900 (PMC7934650; doi:10.7717/peerj.10900)
Supplement: Supplemental Information 1 [file peerj-09-10900-s001.xlsx]

## Sheet: Deromyrma-data
	CASENT	BLF	suffix	species	DNA	CL	POOC	CWb	FRS	FL	SL	MW	SPTI	PEW	PPW	ML	SPST	NOL	NOH	PPH	EL	X	coordinates	concat	Lat	Long	X.1	indices	CL/CWb	POOC/CWb	FRS/CWb	FL/CWb	SL/CWb	MW/CWb	SPTI/CWb	PEW/CWb	PPW/CWb	ML/CWb	SPST/CWb	NOL/CWb	NOH/CWb	PPH/CWb	EL/CWb	X.2	LDA classification	X.3	Observed	bressleri	gonacantha
1	NA	F.C.Andrian.1998xii-1	NA	bressleri		2310	1280	1300	288	410	3088	980	350	345	532	3200	670	695	290	505	380	-		bressleri-F.C.Andrian.1998xii-1	-18.695	48.8133	NA		1.77692	0.984615	0.221538	0.315385	2.37538	0.753846	0.269231	0.265385	0.409231	2.46154	0.515385	0.534615	0.223077	0.388462	0.292308	NA		1	bressleri	1	0
2	NA	F.C.Andrian.1998xii-1	NA	bressleri		2344	1270	1324	292	432	3100	1000	340	332	528	3240	678	670	300	510	380	-		bressleri-F.C.Andrian.1998xii-1	-18.695	48.8133	NA		1.77039	0.959215	0.220544	0.326284	2.34139	0.755287	0.256798	0.250755	0.398792	2.44713	0.512085	0.506042	0.226586	0.385196	0.287009	NA		2	bressleri	1	0
3	NA	BLF122(37)	NA	bressleri		2196	1240	1196	272	385	2928	904	415	320	480	3000	585	630	272	460	322	-		bressleri-BLF122(37)	-18.695	48.8133	NA		1.83612	1.03679	0.227425	0.321906	2.44816	0.755853	0.34699	0.267559	0.401338	2.50836	0.48913	0.526756	0.227425	0.384615	0.269231	NA		3	bressleri	1	0
4	NA	BLF122(36)	NA	bressleri		2220	1220	1220	285	395	2968	920	455	308	490	3040	590	660	260	470	342	-		bressleri-BLF122(36)	-18.695	48.8133	NA		1.81967	1	0.233607	0.32377	2.43279	0.754098	0.372951	0.252459	0.401639	2.4918	0.483607	0.540984	0.213115	0.385246	0.280328	NA		4	bressleri	1	0
5	NA	BLF121(25)	NA	bressleri		2220	1220	1224	268	390	2968	940	390	310	468	3040	570	632	270	460	352	-		bressleri-BLF121(25)	-18.695	48.8133	NA		1.81373	0.996732	0.218954	0.318627	2.42484	0.767974	0.318627	0.253268	0.382353	2.48366	0.465686	0.51634	0.220588	0.375817	0.287582	NA		5	bressleri	1	0
6	NA	BLF121(23)	NA	bressleri		2270	1260	1240	278	405	3048	960	325	340	512	3160	680	655	290	500	370	-		bressleri-BLF121(23)	-18.695	48.8133	NA		1.83065	1.01613	0.224194	0.326613	2.45806	0.774194	0.262097	0.274194	0.412903	2.54839	0.548387	0.528226	0.233871	0.403226	0.298387	NA		6	bressleri	1	0
7	NA	F.C.Andrian.1998xii-2	NA	bressleri		2340	1280	1324	300	430	3080	1010	440	360	532	3328	650	690	325	525	382	-		bressleri-F.C.Andrian.1998xii-2	-18.695	48.8133	NA		1.76737	0.966767	0.226586	0.324773	2.32628	0.76284	0.332326	0.271903	0.401813	2.5136	0.490937	0.521148	0.245468	0.396526	0.28852	NA		7	bressleri	1	0
8	NA	F.C.Andrian.1998xii-3	NA	bressleri		2356	1300	1340	300	420	3160	1004	390	358	542	3288	690	695	310	530	380	-		bressleri-F.C.Andrian.1998xii-3	-18.695	48.8133	NA		1.75821	0.970149	0.223881	0.313433	2.35821	0.749254	0.291045	0.267164	0.404478	2.45373	0.514925	0.518657	0.231343	0.395522	0.283582	NA		8	bressleri	1	0
9	CASENT0274150	BLF28094	NA	bressleri		2280	1260	1270	300	410	2960	960	510	325	500	3060	620	645	300	510	360	-		bressleri-BLF28094	-18.4104	48.8189	NA		1.79528	0.992126	0.23622	0.322835	2.33071	0.755906	0.401575	0.255906	0.393701	2.40945	0.488189	0.507874	0.23622	0.401575	0.283465	NA		9	bressleri	1	0
10	CASENT274026	BLF28095	NA	bressleri		2280	1240	1296	308	430	3040	980	495	340	512	3152	650	662	305	540	390	-		bressleri-BLF28095	-18.4104	48.8189	NA		1.75926	0.95679	0.237654	0.33179	2.34568	0.756173	0.381944	0.262346	0.395062	2.4321	0.501543	0.510802	0.23534	0.416667	0.300926	NA		10	bressleri	1	0
11	CASENT0822148	BLF28095	NA	bressleri		2256	1240	1260	285	405	2920	940	520	328	512	3080	588	630	285	518	370	-		bressleri-BLF28095	-18.4104	48.8189	NA		1.79048	0.984127	0.22619	0.321429	2.31746	0.746032	0.412698	0.260317	0.406349	2.44444	0.466667	0.5	0.22619	0.411111	0.293651	NA		11	bressleri	1	0
12	CASENT0822149	BLF27719	NA	bressleri		2296	1270	1300	290	400	3040	970	475	325	500	3128	610	670	295	505	380	-		bressleri-BLF27719	-18.4061	48.8203	NA		1.76615	0.976923	0.223077	0.307692	2.33846	0.746154	0.365385	0.25	0.384615	2.40615	0.469231	0.515385	0.226923	0.388462	0.292308	NA		12	bressleri	1	0
13	CASENT0822147	BLF27719	NA	bressleri		2220	1230	1244	285	385	2968	944	500	312	485	3000	620	635	292	490	370	-		bressleri-BLF27719	-18.4061	48.8203	NA		1.78457	0.988746	0.2291	0.309486	2.38585	0.758842	0.401929	0.250804	0.389871	2.41158	0.498392	0.51045	0.234727	0.393891	0.297428	NA		13	bressleri	1	0
14	CASENT0822145	BLF27668	PT	bressleri		2236	1230	1264	292	400	2960	960	495	332	502	3000	620	650	290	518	360	-		bressleri-BLF27668	-18.4061	48.8203	NA		1.76899	0.973101	0.231013	0.316456	2.34177	0.759494	0.391614	0.262658	0.397152	2.37342	0.490506	0.514241	0.22943	0.40981	0.28481	NA		14	bressleri	1	0
15	CASENT0273509	BLF27668	HT	bressleri		2200	1220	1200	285	388	2912	944	520	332	498	2980	610	635	310	522	360	-		bressleri-BLF27668	-18.4061	48.8203	NA		1.83333	1.01667	0.2375	0.323333	2.42667	0.786667	0.433333	0.276667	0.415	2.48333	0.508333	0.529167	0.258333	0.435	0.3	NA		15	bressleri	1	0
16	CASENT0822146	BLF27668	PT	bressleri		2164	1220	1176	278	378	2872	900	490	318	482	2920	575	605	272	490	350	-		bressleri-BLF27668	-18.4061	48.8203	NA		1.84014	1.03741	0.236395	0.321429	2.44218	0.765306	0.416667	0.270408	0.409864	2.48299	0.488946	0.514456	0.231293	0.416667	0.297619	NA		16	bressleri	1	0
17	CASENT0273507	BLF27719	NA	bressleri		2240	1230	1260	290	400	2992	944	485	335	488	3060	620	620	298	488	370	-		bressleri-BLF27719	-18.4061	48.8203	NA		1.77778	0.97619	0.230159	0.31746	2.3746	0.749206	0.384921	0.265873	0.387302	2.42857	0.492063	0.492063	0.236508	0.387302	0.293651	NA		17	bressleri	1	0
18	CASENT0100521	BLF121(23)	5	bressleri		2256	1260	1230	262	405	3080	964	330	340	510	3160	690	658	295	502	368	-		bressleri-BLF121(23)	-18.695	48.8133	NA		1.83415	1.02439	0.213008	0.329268	2.50407	0.78374	0.268293	0.276423	0.414634	2.56911	0.560976	0.534959	0.239837	0.40813	0.299187	NA		18	bressleri	1	0
19	CASENT0822137	BLF13288	HT	bressleri		2280	1260	1250	302	435	2912	996	335	315	540	3112	508	675	290	525	342	-		betampona-BLF13288	-17.8867	49.2025	NA		1.824	1.008	0.2416	0.348	2.3296	0.7968	0.268	0.252	0.432	2.4896	0.4064	0.54	0.232	0.42	0.2736	NA		19	bressleri	1	0
20	CASENT0822138	BLF13288	PT	bressleri		2260	1250	1220	312	420	2872	964	388	320	530	3060	490	675	288	520	332	-		betampona-BLF13288	-17.8867	49.2025	NA		1.85246	1.02459	0.255738	0.344262	2.3541	0.790164	0.318033	0.262295	0.434426	2.5082	0.401639	0.553279	0.236066	0.42623	0.272131	NA		20	bressleri	1	0
21	CASENT0822139	BLF12934	NA	bressleri		2150	1220	1156	238	405	2992	916	390	278	460	2928	490	630	250	438	320	-		betampona-BLF12934	-16.8243	49.9642	NA		1.85986	1.05536	0.205882	0.350346	2.58824	0.792388	0.33737	0.240484	0.397924	2.53287	0.423875	0.544983	0.216263	0.378893	0.276817	NA		21	bressleri	1	0
22	CASENT0178465	BLF12934	NA	bressleri		2280	1260	1270	290	422	3060	964	310	315	518	3100	510	650	275	532	350	-		betampona-BLF12934	-16.8243	49.9642	NA		1.79528	0.992126	0.228346	0.332283	2.40945	0.759055	0.244094	0.248031	0.407874	2.44094	0.401575	0.511811	0.216535	0.418898	0.275591	NA		22	bressleri	1	0
23	CASENT0065562	BLF12919	NA	bressleri	COI	2396	1300	1350	288	450	3220	1064	480	348	610	3220	625	630	300	560	390	-		betampona-BLF12919	-16.8243	49.9642	NA		1.77481	0.962963	0.213333	0.333333	2.38519	0.788148	0.355556	0.257778	0.451852	2.38519	0.462963	0.466667	0.222222	0.414815	0.288889	NA		23	bressleri	1	0
24	CASENT0822141	BLF12919	NA	bressleri		2400	1300	1370	300	450	3180	1036	435	340	580	3260	560	670	302	555	375	-		betampona-BLF12919	-16.8243	49.9642	NA		1.75182	0.948905	0.218978	0.328467	2.32117	0.756204	0.317518	0.248175	0.423358	2.37956	0.408759	0.489051	0.220438	0.405109	0.273723	NA		24	bressleri	1	0
25	CASENT0822142	BLF12985	NA	bressleri		2290	1260	1276	282	412	3000	1010	250	312	515	3088	590	640	288	498	370	-		betampona-BLF12985	-16.8243	49.9642	NA		1.79467	0.987461	0.221003	0.322884	2.3511	0.791536	0.195925	0.244514	0.403605	2.42006	0.462382	0.501567	0.225705	0.390282	0.289969	NA		25	bressleri	1	0
26	CASENT0066845	BLF12985	NA	bressleri	COI	2280	1250	1304	320	432	3100	1030	425	330	575	3180	545	640	300	570	360	-		betampona-BLF12985	-16.8243	49.9642	NA		1.74847	0.958589	0.245399	0.331288	2.3773	0.789877	0.32592	0.253067	0.440951	2.43865	0.417945	0.490798	0.230061	0.437117	0.276074	NA		26	bressleri	1	0
27	CASENT0067574	BLF13288b	PT	bressleri	COI	2380	1280	1370	320	462	3140	1030	235	338	550	3240	560	662	300	550	365	-		betampona-BLF13288b	-17.8867	49.2025	NA		1.73723	0.934307	0.233577	0.337226	2.29197	0.751825	0.171533	0.246715	0.40146	2.36496	0.408759	0.483212	0.218978	0.40146	0.266423	NA		27	bressleri	1	0
28	CASENT0066999	BLF13381	PT	bressleri	COI	2370	1310	1330	328	450	3088	1030	355	355	552	3200	500	700	288	535	362	-		betampona-BLF13381	-17.8867	49.2025	NA		1.78195	0.984962	0.246617	0.338346	2.3218	0.774436	0.266917	0.266917	0.415038	2.40602	0.37594	0.526316	0.216541	0.402256	0.27218	NA		28	bressleri	1	0
29	CASENT0070378	BLF13241	NA	bressleri		2280	1260	1236	310	410	2928	996	330	312	500	3088	442	650	290	530	340	-		betampona-BLF13241	-17.8867	49.2025	NA		1.84466	1.01942	0.250809	0.331715	2.36893	0.805825	0.26699	0.252427	0.404531	2.49838	0.357605	0.52589	0.234628	0.428803	0.275081	NA		29	bressleri	1	0
30	CASENT0067682	BLF13288	PT	bressleri		2244	1240	1220	290	422	2900	950	338	302	520	3060	495	670	275	498	330	-		betampona-BLF13288	-17.8867	49.2025	NA		1.83934	1.01639	0.237705	0.345902	2.37705	0.778689	0.277049	0.247541	0.42623	2.5082	0.405738	0.54918	0.22541	0.408197	0.270492	NA		30	bressleri	1	0
31	CASENT0497021	BLF8091	NA	gonacantha		2480	1350	1420	330	485	3140	1000	615	340	500	3272	955	700	280	460	345	-		gonacantha-BLF8091	-15.1883	49.615	NA		1.74648	0.950704	0.232394	0.341549	2.21127	0.704225	0.433099	0.239437	0.352113	2.30423	0.672535	0.492958	0.197183	0.323944	0.242958	NA		31	gonacantha	0	0.999996
32	CASENT0497021	BLF8091	NA	gonacantha		2500	1420	1404	300	480	3160	980	560	350	500	3320	955	688	260	458	355	-		gonacantha-BLF8091	-15.1883	49.615	NA		1.78063	1.0114	0.213675	0.34188	2.25071	0.698006	0.39886	0.249288	0.356125	2.36467	0.680199	0.490028	0.185185	0.326211	0.252849	NA		32	gonacantha	0	0.999994
33	CASENT0212394	BLF27051	NA	gonacantha		2740	1512	1580	392	530	3440	1160	715	442	625	3800	1115	760	340	610	410	-		gonacantha-BLF27051	-14.104	50.0357	NA		1.73418	0.956962	0.248101	0.335443	2.17722	0.734177	0.452532	0.279747	0.39557	2.40506	0.705696	0.481013	0.21519	0.386076	0.259494	NA		33	gonacantha	0	1
34	CASENT0212393	BLF27051	NA	gonacantha		2680	1488	1500	365	522	3360	1096	645	418	610	3600	1100	740	338	570	390	-		gonacantha-BLF27051	-14.104	50.0357	NA		1.78667	0.992	0.243333	0.348	2.24	0.730667	0.43	0.278667	0.406667	2.4	0.733333	0.493333	0.225333	0.38	0.26	NA		34	gonacantha	0	1
35	CASENT0057287	BLF10998	NA	gonacantha		2320	1284	1300	300	448	3000	940	670	350	528	3072	890	675	265	490	320	-		gonacantha-BLF10998	-14.6793	50.1837	NA		1.78462	0.987692	0.230769	0.344615	2.30769	0.723077	0.515385	0.269231	0.406154	2.36308	0.684615	0.519231	0.203846	0.376923	0.246154	NA		35	gonacantha	0	0.999041
36	CASENT0822150	BLF10998	NA	gonacantha		2380	1340	1320	300	445	3048	940	630	375	560	3128	960	670	300	510	328	-		gonacantha-BLF10998	-14.6793	50.1837	NA		1.80303	1.01515	0.227273	0.337121	2.30909	0.712121	0.477273	0.284091	0.424242	2.3697	0.727273	0.507576	0.227273	0.386364	0.248485	NA		36	gonacantha	0	0.999842
37	CASENT0107566	BLF11016	NA	gonacantha		2528	1410	1444	372	500	3400	1024	535	382	560	3460	1120	732	280	520	372	-		gonacantha-BLF11016	-14.6793	50.1837	NA		1.75069	0.976454	0.257618	0.34626	2.35457	0.709141	0.370499	0.264543	0.387812	2.39612	0.775623	0.506925	0.193906	0.360111	0.257618	NA		37	gonacantha	0	1
38	CASENT0822151	BLF11016	NA	gonacantha		2568	1402	1450	382	505	3368	1076	650	405	578	3560	1140	800	298	575	370	-		gonacantha-BLF11016	-14.6793	50.1837	NA		1.77103	0.966897	0.263448	0.348276	2.32276	0.742069	0.448276	0.27931	0.398621	2.45517	0.786207	0.551724	0.205517	0.396552	0.255172	NA		38	gonacantha	0	0.999997
39	CASENT0243506	BLF27040	NA	gonacantha		2510	1410	1410	348	480	3180	1030	810	390	580	3320	1040	700	310	560	360	-		gonacantha-BLF27040	-14.104	50.0357	NA		1.78014	1	0.246809	0.340426	2.25532	0.730496	0.574468	0.276596	0.411348	2.35461	0.737589	0.496454	0.219858	0.397163	0.255319	NA		39	gonacantha	0	1
40	CASENT0822158	BLF27040	NA	gonacantha		2550	1360	1560	390	498	3280	1104	820	438	615	3500	1100	740	305	560	390	-		gonacantha-BLF27040	-14.104	50.0357	NA		1.63462	0.871795	0.25	0.319231	2.10256	0.707692	0.525641	0.280769	0.394231	2.24359	0.705128	0.474359	0.195513	0.358974	0.25	NA		40	gonacantha	0	1
41	CASENT0212356	BLF27191	NA	gonacantha		2600	1424	1540	392	520	3352	1090	730	438	628	3480	1100	760	308	575	402	-		gonacantha-BLF27191	-14.104	50.0357	NA		1.68831	0.924675	0.254545	0.337662	2.17662	0.707792	0.474026	0.284416	0.407792	2.25974	0.714286	0.493506	0.2	0.373377	0.261039	NA		41	gonacantha	0	1
42	CASENT0822159	BLF27191	NA	gonacantha		2500	1360	1420	348	482	3128	1024	815	390	570	3300	1050	660	300	540	350	-		gonacantha-BLF27191	-14.104	50.0357	NA		1.76056	0.957746	0.24507	0.339437	2.20282	0.721127	0.573944	0.274648	0.401408	2.32394	0.739437	0.464789	0.211268	0.380282	0.246479	NA		42	gonacantha	0	1
43	CASENT0107567	BLF11005	NA	gonacantha	COI	2640	1490	1510	362	478	3328	1060	545	400	565	3592	1080	700	302	535	368	-		gonacantha-BLF11005	-14.6793	50.1837	NA		1.74834	0.986755	0.239735	0.316556	2.20397	0.701987	0.360927	0.264901	0.374172	2.37881	0.715232	0.463576	0.2	0.354305	0.243709	NA		43	gonacantha	0	0.999973
44	CASENT0822152	BLF11005	NA	gonacantha		2710	1520	1540	390	498	3352	1100	535	432	600	3648	1080	812	332	582	370	-		gonacantha-BLF11005	-14.6793	50.1837	NA		1.75974	0.987013	0.253247	0.323377	2.17662	0.714286	0.347403	0.280519	0.38961	2.36883	0.701299	0.527273	0.215584	0.377922	0.24026	NA		44	gonacantha	0	0.997795
45	CASENT0107561	BLF11028	NA	gonacantha	COI	2490	1380	1470	345	472	3208	1060	712	370	560	3352	1000	740	282	500	375	-		gonacantha-BLF11028	-14.6793	50.1837	NA		1.69388	0.938776	0.234694	0.321088	2.18231	0.721088	0.484354	0.251701	0.380952	2.28027	0.680272	0.503401	0.191837	0.340136	0.255102	NA		45	gonacantha	0	0.999996
46	CASENT0822154	BLF11028	NA	gonacantha		2420	1330	1396	328	460	3040	1020	665	365	525	3220	925	715	282	480	338	-		gonacantha-BLF11028	-14.6793	50.1837	NA		1.73352	0.952722	0.234957	0.329513	2.17765	0.730659	0.476361	0.261461	0.376074	2.30659	0.662607	0.512178	0.202006	0.34384	0.24212	NA		46	gonacantha	0	0.9999
47	CASENT0243596	BLF27044(10)	NA	gonacantha		2648	1488	1564	410	510	3440	1130	870	430	650	3640	1045	760	345	620	380	-		gonacantha-BLF27044(10)	-14.104	50.0357	NA		1.69309	0.951407	0.262148	0.326087	2.19949	0.722506	0.556266	0.274936	0.415601	2.32737	0.668159	0.485934	0.220588	0.396419	0.242967	NA		47	gonacantha	0	0.999975
48	CASENT0049889	BLF8011	NA	gonacantha	COI	2450	1340	1384	345	485	3060	980	420	355	500	3300	880	720	278	440	340	-		gonacantha-BLF8011	-15.1883	49.615	NA		1.77023	0.968208	0.249277	0.350434	2.21098	0.708092	0.303468	0.256503	0.361272	2.38439	0.635838	0.520231	0.200867	0.317919	0.245665	NA		48	gonacantha	0	0.998158
49	CASENT0107368	BLF11096	NA	gonacantha	COI	2470	1360	1376	328	460	3200	970	640	380	550	3300	1120	750	310	510	352	-		gonacantha-BLF11096	-14.6793	50.1837	NA		1.79506	0.988372	0.238372	0.334302	2.32558	0.704942	0.465116	0.276163	0.399709	2.39826	0.813953	0.545058	0.225291	0.37064	0.255814	NA		49	gonacantha	0	0.999999
50	CASENT0374515	BLF32976	NA	gonacantha		2608	1440	1530	400	510	3448	1120	720	400	570	3520	1060	750	322	555	400	-		gonacantha-BLF32976	-15.3233	50.3075	NA		1.70458	0.941176	0.261438	0.333333	2.25359	0.732026	0.470588	0.261438	0.372549	2.30065	0.69281	0.490196	0.210458	0.362745	0.261438	NA		50	gonacantha	0	0.999999
51	CASENT0374588	BLF32976	NA	gonacantha		2512	1400	1456	402	490	3328	1004	625	360	558	3352	995	695	300	550	355	-		gonacantha-BLF32976	-15.3233	50.3075	NA		1.72527	0.961538	0.276099	0.336538	2.28571	0.68956	0.429258	0.247253	0.383242	2.3022	0.683379	0.477335	0.206044	0.377747	0.243819	NA		51	gonacantha	0	0.992937
52	CASENT0375341	BLF33066	NA	gonacantha		2420	1350	1370	362	458	3200	996	690	365	560	3220	1030	680	290	545	360	-		gonacantha-BLF33066	-15.3233	50.3075	NA		1.76642	0.985401	0.264234	0.334307	2.33577	0.727007	0.50365	0.266423	0.408759	2.35036	0.751825	0.49635	0.211679	0.39781	0.262774	NA		52	gonacantha	0	0.999941
53	CASENT0375342	BLF32974	NA	gonacantha		2480	1392	1430	328	450	3400	990	660	350	555	3280	980	705	275	528	370	-		gonacantha-BLF32974	-15.3233	50.3075	NA		1.73427	0.973427	0.229371	0.314685	2.37762	0.692308	0.461538	0.244755	0.388112	2.29371	0.685315	0.493007	0.192308	0.369231	0.258741	NA		53	gonacantha	0	0.988534
54	CASENT0497024	BLF8091	NA	gonacantha	COI	2500	1400	1420	305	510	3200	980	600	345	502	3288	930	710	270	450	350	-		gonacantha-BLF8091	-15.1883	49.615	NA		1.76056	0.985915	0.214789	0.359155	2.25352	0.690141	0.422535	0.242958	0.353521	2.31549	0.65493	0.5	0.190141	0.316901	0.246479	NA		54	gonacantha	0	1
55	CASENT0497024	BLF8091	NA	gonacantha		2560	1420	1470	320	510	3320	1040	610	360	530	3360	1010	730	300	510	368	-		gonacantha-BLF8091	-15.1883	49.615	NA		1.7415	0.965986	0.217687	0.346939	2.2585	0.707483	0.414966	0.244898	0.360544	2.28571	0.687075	0.496599	0.204082	0.346939	0.25034	NA		55	gonacantha	0	0.999993
56	CASENT0102039	gonacantha_ST	NA	gonacantha		2580	1440	1464	368	510	3420	1050	640	370	530	3480	1020	750	300	520	372	-		gonacantha-gonacantha_ST	-15.4	49.8	NA		1.7623	0.983607	0.251366	0.348361	2.33607	0.717213	0.437158	0.252732	0.362022	2.37705	0.696721	0.512295	0.204918	0.355191	0.254098	NA		56	gonacantha	0	0.999987
57	CASENT0102038	gonacantha_ST	NA	gonacantha		2560	1400	1490	370	520	3320	1050	595	355	560	3480	950	740	275	540	370	-		gonacantha-gonacantha_ST	-15.4	49.8	NA		1.71812	0.939597	0.248322	0.348993	2.22819	0.704698	0.399329	0.238255	0.375839	2.33557	0.637584	0.496644	0.184564	0.362416	0.248322	NA		57	gonacantha	0	0.994475
58	CASENT0094652	ANTC2700	NA	sahafina		2280	1260	1290	300	432	2920	910	520	330	500	3120	830	700	298	490	320	-		sahafina-ANTC2700	-17.6667	49.5	NA		1.76744	0.976744	0.232558	0.334884	2.26357	0.705426	0.403101	0.255814	0.387597	2.4186	0.643411	0.542636	0.231008	0.379845	0.248062	NA		58	sahafina	0	9e-06
59	CASENT0094653	ANTC2700	NA	sahafina		2200	1240	1200	270	402	2900	860	500	318	478	3000	805	655	285	482	302	-		sahafina-ANTC2700	-17.6667	49.5	NA		1.83333	1.03333	0.225	0.335	2.41667	0.716667	0.416667	0.265	0.398333	2.5	0.670833	0.545833	0.2375	0.401667	0.251667	NA		59	sahafina	0	1e-06
60	CASENT0095830	ANTC2738	NA	sahafina		2230	1260	1280	300	420	3040	900	510	340	525	3032	870	665	282	500	332	-		sahafina-ANTC2738	-17.6667	49.5	NA		1.74219	0.984375	0.234375	0.328125	2.375	0.703125	0.398438	0.265625	0.410156	2.36875	0.679688	0.519531	0.220312	0.390625	0.259375	NA		60	sahafina	0	0.00023
61	CASENT0822123	ANTC2738	NA	sahafina		2310	1260	1300	295	438	3080	940	450	345	490	3120	955	680	288	510	325	-		sahafina-ANTC2738	-17.6667	49.5	NA		1.77692	0.969231	0.226923	0.336923	2.36923	0.723077	0.346154	0.265385	0.376923	2.4	0.734615	0.523077	0.221538	0.392308	0.25	NA		61	sahafina	0	0.006182
62	CASENT0059359	BLF12386	NA	sahafina	COI	2276	1280	1260	275	425	3000	896	600	312	510	3080	850	720	280	480	310	-		sahafina-BLF12386	-21.4	47.94	NA		1.80635	1.01587	0.218254	0.337302	2.38095	0.711111	0.47619	0.247619	0.404762	2.44444	0.674603	0.571429	0.222222	0.380952	0.246032	NA		62	sahafina	0	0.000664
63	CASENT0822124	BLF12386	NA	sahafina		2110	1184	1164	250	400	2760	816	515	272	435	2840	710	638	250	428	288	-		sahafina-BLF12386	-21.4	47.94	NA		1.81271	1.01718	0.214777	0.343643	2.37113	0.701031	0.44244	0.233677	0.373711	2.43986	0.609966	0.54811	0.214777	0.367698	0.247423	NA		63	sahafina	0	0
64	CASENT0060018	BLF12394	NA	sahafina		2360	1310	1380	328	465	3000	990	590	372	540	3160	930	722	298	530	350	-		sahafina-BLF12394	-21.4	47.94	NA		1.71014	0.949275	0.237681	0.336957	2.17391	0.717391	0.427536	0.269565	0.391304	2.28986	0.673913	0.523188	0.215942	0.384058	0.253623	NA		64	sahafina	0	0.251642
65	CASENT0060017	BLF12394	NA	sahafina	COI	2260	1270	1300	268	432	2928	940	525	315	488	3048	845	710	275	482	330	-		sahafina-BLF12394	-21.4	47.94	NA		1.73846	0.976923	0.206154	0.332308	2.25231	0.723077	0.403846	0.242308	0.375385	2.34462	0.65	0.546154	0.211538	0.370769	0.253846	NA		65	sahafina	0	2.4e-05
66	CASENT0095660	ANTC2685	NA	sahafina		2000	1120	1064	255	362	2540	796	502	275	410	2680	690	570	252	442	300	-		sahafina-ANTC2685	-17.6667	49.5	NA		1.8797	1.05263	0.239662	0.340226	2.38722	0.74812	0.471805	0.258459	0.385338	2.5188	0.648496	0.535714	0.236842	0.415414	0.281955	NA		66	sahafina	0	0
67	CASENT0822127	ANTC2685	NA	sahafina		2060	1160	1160	268	385	2680	840	670	290	465	2820	700	640	280	460	302	-		sahafina-ANTC2685	-17.6667	49.5	NA		1.77586	1	0.231034	0.331897	2.31034	0.724138	0.577586	0.25	0.400862	2.43103	0.603448	0.551724	0.241379	0.396552	0.260345	NA		67	sahafina	0	0
68	CASENT0132230	BLF19461	PT	sahafina	COI	2160	1230	1196	270	390	2920	876	440	290	430	2960	750	670	280	465	305	-		sahafina-BLF19461	-18.8145	48.962	NA		1.80602	1.02843	0.225753	0.326087	2.44147	0.732441	0.367893	0.242475	0.359532	2.47492	0.62709	0.560201	0.234114	0.388796	0.255017	NA		68	sahafina	0	0
69	CASENT0822128	BLF19461	PT	sahafina		2200	1230	1224	305	415	2820	920	535	332	485	2960	845	700	315	515	315	-		sahafina-BLF19461	-18.8145	48.962	NA		1.79739	1.0049	0.249183	0.339052	2.30392	0.751634	0.437092	0.271242	0.396242	2.4183	0.690359	0.571895	0.257353	0.420752	0.257353	NA		69	sahafina	0	0
70	CASENT0132233	BLF19467	HT	sahafina	COI	2324	1300	1370	340	450	3048	996	500	348	520	3220	892	685	315	510	350	-		sahafina-BLF19467	-18.8145	48.962	NA		1.69635	0.948905	0.248175	0.328467	2.22482	0.727007	0.364964	0.254015	0.379562	2.35036	0.651095	0.5	0.229927	0.372263	0.255474	NA		70	sahafina	0	0.000128
71	CASENT0822130	BLF19467	PT	sahafina		2160	1200	1200	280	410	2920	896	380	310	460	2968	752	680	288	482	300	-		sahafina-BLF19467	-18.8145	48.962	NA		1.8	1	0.233333	0.341667	2.43333	0.746667	0.316667	0.258333	0.383333	2.47333	0.626667	0.566667	0.24	0.401667	0.25	NA		71	sahafina	0	0
72	CASENT0822131	BLF19479	PT	sahafina		2220	1360	1360	340	468	3180	960	450	338	490	3200	950	720	312	502	355	-		sahafina-BLF19479	-18.8145	48.962	NA		1.63235	1	0.25	0.344118	2.33824	0.705882	0.330882	0.248529	0.360294	2.35294	0.698529	0.529412	0.229412	0.369118	0.261029	NA		72	sahafina	0	0
73	CASENT0822132	BLF19479	PT	sahafina		2120	1220	1160	310	412	2840	820	425	300	448	2800	760	645	285	460	290	-		sahafina-BLF19479	-18.8145	48.962	NA		1.82759	1.05172	0.267241	0.355172	2.44828	0.706897	0.366379	0.258621	0.386207	2.41379	0.655172	0.556034	0.24569	0.396552	0.25	NA		73	sahafina	0	0
74	CASENT0067487	BLF12624	NA	sahafina		2400	1350	1380	305	440	3100	950	570	310	470	3240	860	680	270	500	340	-		sahafina-BLF12624	-16.455	49.7875	NA		1.73913	0.978261	0.221014	0.318841	2.24638	0.688406	0.413043	0.224638	0.34058	2.34783	0.623188	0.492754	0.195652	0.362319	0.246377	NA		74	sahafina	0	1.7e-05
75	CASENT0822155	BLF12624	NA	sahafina		2300	1270	1330	335	430	2940	880	550	308	475	3040	730	728	280	498	340	-		sahafina-BLF12624	-16.455	49.7875	NA		1.72932	0.954887	0.25188	0.323308	2.21053	0.661654	0.413534	0.231579	0.357143	2.28571	0.548872	0.547368	0.210526	0.374436	0.255639	NA		75	sahafina	0	0
76	CASENT0822156	BLF12668	NA	sahafina		2340	1320	1340	370	465	3040	920	515	318	480	3120	865	715	282	468	320	-		sahafina-BLF12668	-16.455	49.7875	NA		1.74627	0.985075	0.276119	0.347015	2.26866	0.686567	0.384328	0.237313	0.358209	2.32836	0.645522	0.533582	0.210448	0.349254	0.238806	NA		76	sahafina	0	0.011009
77	CASENT0067123	BLF12668	NA	sahafina	COI	2420	1340	1400	390	465	3080	940	510	340	532	3280	915	690	295	525	352	-		sahafina-BLF12668	-16.455	49.7875	NA		1.72857	0.957143	0.278571	0.332143	2.2	0.671429	0.364286	0.242857	0.38	2.34286	0.653571	0.492857	0.210714	0.375	0.251429	NA		77	sahafina	0	0.002386
78	CASENT0067124	BLF12609	NA	sahafina		2420	1310	1430	340	460	3168	960	620	342	520	3320	912	735	288	530	352	-		sahafina-BLF12609	-16.455	49.7875	NA		1.69231	0.916084	0.237762	0.321678	2.21538	0.671329	0.433566	0.239161	0.363636	2.32168	0.637762	0.513986	0.201399	0.370629	0.246154	NA		78	sahafina	0	0.000243
79	CASENT0822157	BLF12609	NA	sahafina		2310	1280	1324	332	442	2940	900	550	308	465	3060	790	652	255	490	332	-		sahafina-BLF12609	-16.455	49.7875	NA		1.74471	0.966767	0.250755	0.333837	2.22054	0.679758	0.415408	0.232628	0.351208	2.31118	0.596677	0.492447	0.192598	0.370091	0.250755	NA		79	sahafina	0	3.8e-05
80	CASENT0067120	BLF12662	NA	sahafina	COI	2420	1330	1396	350	488	3208	950	655	328	528	3260	900	740	302	530	328	-		sahafina-BLF12662	-16.455	49.7875	NA		1.73352	0.952722	0.250716	0.34957	2.29799	0.680516	0.469198	0.234957	0.378223	2.33524	0.644699	0.530086	0.216332	0.379656	0.234957	NA		80	sahafina	0	0.012008
81	CASENT0067122	BLF12662	NA	sahafina		2360	1300	1360	370	465	3000	920	450	332	490	3160	830	710	290	528	350	-		sahafina-BLF12662	-16.455	49.7875	NA		1.73529	0.955882	0.272059	0.341912	2.20588	0.676471	0.330882	0.244118	0.360294	2.32353	0.610294	0.522059	0.213235	0.388235	0.257353	NA		81	sahafina	0	0
82	CASENT0822133	BLF19474	PT	sahafina		2360	1320	1340	322	470	3080	960	510	350	508	3200	938	712	328	560	335	-		sahafina-BLF19474	-18.8145	48.962	NA		1.76119	0.985075	0.240299	0.350746	2.29851	0.716418	0.380597	0.261194	0.379104	2.38806	0.7	0.531343	0.244776	0.41791	0.25	NA		82	sahafina	0	8e-06
83	CASENT0822134	BLF19474	PT	sahafina		2460	1360	1420	338	482	3248	1000	555	350	520	3312	938	750	340	550	350	-		sahafina-BLF19474	-18.8145	48.962	NA		1.73239	0.957746	0.238028	0.339437	2.28732	0.704225	0.390845	0.246479	0.366197	2.33239	0.660563	0.528169	0.239437	0.387324	0.246479	NA		83	sahafina	0	0.000121
84	CASENT0822131	BLF12688	NA	sahafina		2280	1300	1270	300	432	2900	864	445	270	448	2960	700	670	260	442	290	-		sahafina-BLF12688	-16.455	49.7875	NA		1.79528	1.02362	0.23622	0.340157	2.28346	0.680315	0.350394	0.212598	0.352756	2.33071	0.551181	0.527559	0.204724	0.348031	0.228346	NA		84	sahafina	0	0
85	CASENT0822183	BLF12688	NA	sahafina		2320	1320	1290	300	440	2920	896	550	298	470	3100	860	690	285	492	312	-		sahafina-BLF12688	-16.455	49.7875	NA		1.79845	1.02326	0.232558	0.341085	2.26357	0.694574	0.426357	0.231008	0.364341	2.4031	0.666667	0.534884	0.22093	0.381395	0.24186	NA		85	sahafina	0	1.3e-05
86	CASENT0067122	BLF12622	NA	sahafina		2364	1320	1364	370	462	2992	920	550	332	490	3140	830	712	290	530	350	-		sahafina-BLF12622	-16.455	49.7875	NA		1.73314	0.967742	0.271261	0.33871	2.19355	0.674487	0.403226	0.243402	0.359238	2.30205	0.608504	0.521994	0.21261	0.388563	0.256598	NA		86	sahafina	0	2e-06
87	CASENT0822182	BLF12622	NA	sahafina		2260	1260	1280	320	428	2888	856	460	305	458	3000	730	715	285	498	330	-		sahafina-BLF12622	-16.455	49.7875	NA		1.76562	0.984375	0.25	0.334375	2.25625	0.66875	0.359375	0.238281	0.357812	2.34375	0.570312	0.558594	0.222656	0.389062	0.257812	NA		87	sahafina	0	0
88	CASENT0060039	BLF12400	NA	sahafina		2220	1240	1240	260	430	2880	880	415	338	500	3000	828	680	270	510	315	-		sahafina-BLF12400	-21.4	47.94	NA		1.79032	1	0.209677	0.346774	2.32258	0.709677	0.334677	0.272581	0.403226	2.41935	0.667742	0.548387	0.217742	0.41129	0.254032	NA		88	sahafina	0	1e-06
89	CASENT0060152	BLF12400	NA	sahafina	COI	2376	1300	1380	320	465	3008	980	460	330	518	3240	860	680	272	505	340	-		sahafina-BLF12400	-21.4	47.94	NA		1.72174	0.942029	0.231884	0.336957	2.17971	0.710145	0.333333	0.23913	0.375362	2.34783	0.623188	0.492754	0.197101	0.365942	0.246377	NA		89	sahafina	0	0.001017
90	CASENT0495064	BLF8138	PT	bressleri		2310	1280	1260	270	402	2980	980	430	302	485	3240	590	675	250	450	330	-		bressleri-BLF8138	-15.1883	49.615	NA		1.83333	1.01587	0.214286	0.319048	2.36508	0.777778	0.34127	0.239683	0.384921	2.57143	0.468254	0.535714	0.198413	0.357143	0.261905	NA		90	bressleri	1	0
91	CASENT0495064	BLF8138	PT	bressleri		2290	1260	1256	270	400	2980	1000	455	278	498	3170	595	620	270	465	345	-		bressleri-BLF8138	-15.1883	49.615	NA		1.82325	1.00318	0.214968	0.318471	2.37261	0.796178	0.362261	0.221338	0.396497	2.52389	0.473726	0.493631	0.214968	0.370223	0.274682	NA		91	bressleri	1	0
92	CASENT0495063	BLF8138	HT	bressleri		2200	1180	1224	270	382	2960	910	450	290	490	3000	535	580	240	470	328	-		bressleri-BLF8138	-15.1883	49.615	NA		1.79739	0.964052	0.220588	0.312092	2.4183	0.743464	0.367647	0.236928	0.400327	2.45098	0.437092	0.473856	0.196078	0.383987	0.267974	NA		92	bressleri	1	0
93	CASENT0822355	BLF8138	PT	bressleri		2280	1240	1244	272	390	2920	980	400	302	482	3180	530	640	245	450	335	-		bressleri-BLF8138	-15.1883	49.615	NA		1.8328	0.996785	0.21865	0.313505	2.34727	0.787781	0.321543	0.242765	0.38746	2.55627	0.426045	0.514469	0.196945	0.361736	0.269293	NA		93	bressleri	1	0
94	CASENT0495065	BLF8138	PT	bressleri		2310	1250	1280	280	400	2980	984	390	315	490	3160	585	630	260	465	345	-		bressleri-BLF8138	-15.1883	49.615	NA		1.80469	0.976562	0.21875	0.3125	2.32812	0.76875	0.304688	0.246094	0.382812	2.46875	0.457031	0.492188	0.203125	0.363281	0.269531	NA		94	bressleri	1	0
95	NA	BLF926(28)	1	bressleri		2380	1300	1360	305	422	3180	1080	330	360	550	3280	600	640	262	510	355	-		bressleri-BLF926(28)	-15.6713	49.974	NA		1.75	0.955882	0.224265	0.310294	2.33824	0.794118	0.242647	0.264706	0.404412	2.41176	0.441176	0.470588	0.192647	0.375	0.261029	NA		95	bressleri	1	0
96	NA	BLF926(28)	1	bressleri		2350	1300	1320	308	410	3160	1030	355	355	538	3180	555	680	282	505	335	-		bressleri-BLF926(28)	-15.6713	49.974	NA		1.7803	0.984848	0.233333	0.310606	2.39394	0.780303	0.268939	0.268939	0.407576	2.40909	0.420455	0.515152	0.213636	0.382576	0.253788	NA		96	bressleri	1	0
97	CASENT0175129	BLF905	1	bressleri	COI	2380	1280	1356	310	415	3208	1056	440	375	570	3220	610	700	285	525	355	-		bressleri-BLF905	-15.6713	49.974	NA		1.75516	0.943953	0.228614	0.306047	2.36578	0.778761	0.324484	0.276549	0.420354	2.37463	0.449853	0.516224	0.210177	0.387168	0.261799	NA		97	bressleri	1	0
98	CASENT0175129	BLF905	NA	bressleri	COI	2360	1280	1330	310	420	3128	1044	425	355	552	3168	600	665	270	550	340	-		bressleri-BLF905	-15.6713	49.974	NA		1.77444	0.962406	0.233083	0.315789	2.35188	0.784962	0.319549	0.266917	0.415038	2.38195	0.451128	0.5	0.203008	0.413534	0.255639	NA		98	bressleri	1	0
99	NA	PSW10372	NA	bressleri		2264	1250	1280	305	398	2940	990	332	318	510	3000	560	580	250	500	340	-		bressleri-PSW10372	-15.4833	49.9	NA		1.76875	0.976562	0.238281	0.310937	2.29688	0.773438	0.259375	0.248438	0.398438	2.34375	0.4375	0.453125	0.195312	0.390625	0.265625	NA		99	bressleri	1	0
100	NA	PSW10372	NA	bressleri		2360	1280	1370	310	420	3088	1060	372	340	532	3272	552	650	260	512	360	-		bressleri-PSW10372	-15.4833	49.9	NA		1.72263	0.934307	0.226277	0.306569	2.25401	0.773723	0.271533	0.248175	0.388321	2.38832	0.40292	0.474453	0.189781	0.373723	0.262774	NA		100	bressleri	1	0
101	CASENT0822135	BLF00926(45)	45	bressleri		2420	1300	1380	332	422	3160	1060	352	345	520	3220	540	650	265	515	350	-		bressleri-BLF00926(45)	-15.6713	49.974	NA		1.75362	0.942029	0.24058	0.305797	2.28986	0.768116	0.255072	0.25	0.376812	2.33333	0.391304	0.471014	0.192029	0.373188	0.253623	NA		101	bressleri	1	0
102	CASENT0822136	BLF00926(45)	45	bressleri		2400	1320	1380	322	422	3240	1044	370	350	530	3192	550	650	260	502	348	-		bressleri-BLF00926(45)	-15.6713	49.974	NA		1.73913	0.956522	0.233333	0.305797	2.34783	0.756522	0.268116	0.253623	0.384058	2.31304	0.398551	0.471014	0.188406	0.363768	0.252174	NA		102	bressleri	1	0
103	CASENT0048942	BLF8004	NA	bressleri	COI	2200	1230	1160	260	370	2880	940	415	312	488	3000	545	600	235	460	310	-		bressleri-BLF8004	-15.1883	49.615	NA		1.89655	1.06034	0.224138	0.318966	2.48276	0.810345	0.357759	0.268966	0.42069	2.58621	0.469828	0.517241	0.202586	0.396552	0.267241	NA		103	bressleri	1	0
104	CASENT0822140	BLF8004	NA	bressleri		2260	1270	1260	288	380	2960	960	470	315	515	3120	590	600	260	485	330	-		bressleri-BLF8004	-15.1883	49.615	NA		1.79365	1.00794	0.228571	0.301587	2.34921	0.761905	0.373016	0.25	0.40873	2.47619	0.468254	0.47619	0.206349	0.384921	0.261905	NA		104	bressleri	1	0
105	CASENT0822143	BLF00906(30)	30	bressleri		2440	1340	1440	330	435	3240	1110	460	360	570	3380	590	695	275	558	355	-		bressleri-BLF00906(30)	-15.6713	49.974	NA		1.69444	0.930556	0.229167	0.302083	2.25	0.770833	0.319444	0.25	0.395833	2.34722	0.409722	0.482639	0.190972	0.3875	0.246528	NA		105	bressleri	1	0
106	CASENT0822144	BLF00906(30)	30	bressleri		2440	1340	1400	348	448	3200	1080	490	348	580	3300	580	695	265	560	362	-		bressleri-BLF00906(30)	-15.6713	49.974	NA		1.74286	0.957143	0.248571	0.32	2.28571	0.771429	0.35	0.248571	0.414286	2.35714	0.414286	0.496429	0.189286	0.4	0.258571	NA		106	bressleri	1	0
107	NA	BLF919	NA	bressleri		2520	1360	1440	330	432	3300	1084	395	358	570	3340	630	700	290	550	370	-		bressleri-BLF919	-15.6667	49.9667	NA		1.75	0.944444	0.229167	0.3	2.29167	0.752778	0.274306	0.248611	0.395833	2.31944	0.4375	0.486111	0.201389	0.381944	0.256944	NA		107	bressleri	1	0
108	NA	BLF00926(49)	NA	bressleri		2540	1370	1450	340	440	3312	1120	390	378	600	3408	670	690	290	560	370	-		bressleri-BLF00926(49)	-15.6713	49.974	NA		1.75172	0.944828	0.234483	0.303448	2.28414	0.772414	0.268966	0.26069	0.413793	2.35034	0.462069	0.475862	0.2	0.386207	0.255172	NA		108	bressleri	1	0
109	CASENT0100523	ANTC5912	NA	bressleri	COI	2340	1280	1324	315	410	3128	1040	300	350	528	3280	590	635	260	518	330	-		bressleri-ANTC5912	-15.6667	49.9981	NA		1.76737	0.966767	0.237915	0.309668	2.36254	0.785498	0.226586	0.26435	0.398792	2.47734	0.445619	0.479607	0.196375	0.391239	0.249245	NA		109	bressleri	1	0
110	CASENT0170868	PSW10372	NA	bressleri		2264	1240	1264	300	390	2912	985	330	318	510	3032	552	590	238	500	342	-		bressleri-PSW10372	-15.4833	49.9	NA		1.79114	0.981013	0.237342	0.308544	2.3038	0.779272	0.261076	0.251582	0.403481	2.39873	0.436709	0.466772	0.188291	0.39557	0.27057	NA		110	bressleri	1	0
111	CASENT0170868	PSW10372	NA	bressleri		2360	1280	1364	310	420	3080	1050	372	335	535	3200	540	650	260	510	362	-		bressleri-PSW10372	-15.4833	49.9	NA		1.73021	0.938416	0.227273	0.307918	2.25806	0.769795	0.272727	0.245601	0.392229	2.34604	0.395894	0.47654	0.190616	0.3739	0.265396	NA		111	bressleri	1	0
112	NA	BLF603	2	swammerdami		2260	1080	1420	358	460	2560	1064	420	355	600	3140	450	640	350	580	382	-		swammerdami-BLF603	-25.0167	46.3	NA		1.59155	0.760563	0.252113	0.323944	1.80282	0.749296	0.295775	0.25	0.422535	2.21127	0.316901	0.450704	0.246479	0.408451	0.269014	NA		112	swammerdami	0	0
113	NA	BLF603	2	swammerdami		2030	1020	1220	290	412	2440	916	300	318	505	2780	340	580	322	500	325	-		swammerdami-BLF603	-25.0167	46.3	NA		1.66393	0.836066	0.237705	0.337705	2	0.75082	0.245902	0.260656	0.413934	2.27869	0.278689	0.47541	0.263934	0.409836	0.266393	NA		113	swammerdami	0	0
114	NA	BLF1312(7)	1	swammerdami		2076	1036	1280	305	440	2472	980	300	315	522	2928	385	600	320	540	338	-		swammerdami-BLF1312(7)	-22.4667	44.85	NA		1.62187	0.809375	0.238281	0.34375	1.93125	0.765625	0.234375	0.246094	0.407813	2.2875	0.300781	0.46875	0.25	0.421875	0.264062	NA		114	swammerdami	0	0
115	NA	BLF1312(7)	1	swammerdami		2200	1100	1380	335	470	2592	1040	410	330	570	3128	485	630	340	590	372	-		swammerdami-BLF1312(7)	-22.4667	44.85	NA		1.5942	0.797101	0.242754	0.34058	1.87826	0.753623	0.297101	0.23913	0.413043	2.26667	0.351449	0.456522	0.246377	0.427536	0.269565	NA		115	swammerdami	0	0
116	NA	BLF1316(10)	2	swammerdami		2260	1110	1436	330	470	2720	1060	370	360	565	3120	490	645	350	585	380	-		swammerdami-BLF1316(10)	-22.4667	44.85	NA		1.57382	0.772981	0.229805	0.327298	1.89415	0.738162	0.25766	0.250696	0.393454	2.1727	0.341226	0.449164	0.243733	0.407382	0.264624	NA		116	swammerdami	0	0
117	NA	BLF1316(10)	3	swammerdami		2340	1160	1480	312	468	2820	1080	405	372	580	3208	500	700	370	610	390	-		swammerdami-BLF1316(10)	-22.4667	44.85	NA		1.58108	0.783784	0.210811	0.316216	1.90541	0.72973	0.273649	0.251351	0.391892	2.16757	0.337838	0.472973	0.25	0.412162	0.263514	NA		117	swammerdami	0	0
118	NA	BLF1474(11)	2	swammerdami		2150	1030	1350	330	440	2620	964	285	330	532	2992	435	635	340	550	370	-		swammerdami-BLF1474(11)	-23.65	44.6333	NA		1.59259	0.762963	0.244444	0.325926	1.94074	0.714074	0.211111	0.244444	0.394074	2.2163	0.322222	0.47037	0.251852	0.407407	0.274074	NA		118	swammerdami	0	0
119	NA	BLF1474(11)	2	swammerdami		2120	1020	1320	315	445	2592	964	275	328	515	3000	380	650	330	520	352	-		swammerdami-BLF1474(11)	-23.65	44.6333	NA		1.60606	0.772727	0.238636	0.337121	1.96364	0.730303	0.208333	0.248485	0.390152	2.27273	0.287879	0.492424	0.25	0.393939	0.266667	NA		119	swammerdami	0	0
120	NA	BLF1474(15)	3	swammerdami		2164	1024	1416	328	470	2608	1024	300	350	568	3048	420	640	358	560	378	-		swammerdami-BLF1474(15)	-23.65	44.6333	NA		1.52825	0.723164	0.231638	0.331921	1.84181	0.723164	0.211864	0.247175	0.40113	2.15254	0.29661	0.451977	0.252825	0.39548	0.266949	NA		120	swammerdami	0	0
121	NA	BLF1474(15)	3	swammerdami		2104	1020	1304	320	435	2512	960	290	328	518	2920	375	615	330	525	338	-		swammerdami-BLF1474(15)	-23.65	44.6333	NA		1.6135	0.782209	0.245399	0.333589	1.92638	0.736196	0.222393	0.251534	0.397239	2.23926	0.287577	0.471626	0.253067	0.402607	0.259202	NA		121	swammerdami	0	0
122	NA	BLF1474(27)	2	swammerdami		2124	1030	1340	328	440	2568	990	220	338	525	2880	432	600	340	540	360	-		swammerdami-BLF1474(27)	-23.65	44.6333	NA		1.58507	0.768657	0.244776	0.328358	1.91642	0.738806	0.164179	0.252239	0.391791	2.14925	0.322388	0.447761	0.253731	0.402985	0.268657	NA		122	swammerdami	0	0
123	NA	BLF1474(27)	2	swammerdami		2040	996	1284	310	418	2520	950	255	328	505	2800	370	540	320	525	332	-		swammerdami-BLF1474(27)	-23.65	44.6333	NA		1.58879	0.775701	0.241433	0.325545	1.96262	0.739875	0.198598	0.255452	0.393302	2.18069	0.288162	0.420561	0.249221	0.408879	0.258567	NA		123	swammerdami	0	0
124	CASENT0009782	BLF1599-2	2	swammerdami		2176	1056	1396	362	480	2472	1030	350	350	582	3032	475	560	318	538	365	-		swammerdami-BLF1599-2	-20.775	47.1683	NA		1.55874	0.756447	0.259312	0.34384	1.77077	0.737822	0.250716	0.250716	0.416905	2.17192	0.340258	0.401146	0.227794	0.385387	0.261461	NA		124	swammerdami	0	0
125	CASENT0009782	BLF1599-2	2	swammerdami		2200	1100	1404	355	462	2528	1040	370	348	615	3152	508	605	332	585	380	-		swammerdami-BLF1599-2	-20.775	47.1683	NA		1.56695	0.783476	0.252849	0.32906	1.80057	0.740741	0.263533	0.247863	0.438034	2.24501	0.361823	0.430912	0.236467	0.416667	0.270655	NA		125	swammerdami	0	0
126	CASENT0003470	BLF2094	NA	swammerdami		2310	1150	1444	348	448	2688	1050	420	360	560	3200	460	670	370	590	378	-		swammerdami-BLF2094	-25.0617	46.87	NA		1.59972	0.796399	0.240997	0.310249	1.8615	0.727147	0.290859	0.249307	0.387812	2.21607	0.31856	0.463989	0.256233	0.408587	0.261773	NA		126	swammerdami	0	0
127	CASENT0003470	BLF2094	NA	swammerdami		2280	1144	1420	328	438	2680	1040	365	348	542	3168	450	640	340	560	372	-		swammerdami-BLF2094	-25.0617	46.87	NA		1.60563	0.805634	0.230986	0.308451	1.88732	0.732394	0.257042	0.24507	0.38169	2.23099	0.316901	0.450704	0.239437	0.394366	0.261972	NA		127	swammerdami	0	0
128	NA	BLF2096	NA	swammerdami		2580	1260	1764	400	550	2872	1256	420	460	682	3600	585	800	450	695	430	-		swammerdami-BLF2096	-25.0617	46.87	NA		1.46259	0.714286	0.226757	0.311791	1.62812	0.712018	0.238095	0.260771	0.386621	2.04082	0.331633	0.453515	0.255102	0.393991	0.243764	NA		128	swammerdami	0	0
129	NA	BLF2096	NA	swammerdami		2660	1300	1850	402	550	3000	1240	420	520	740	3640	570	790	450	720	415	-		swammerdami-BLF2096	-25.0617	46.87	NA		1.43784	0.702703	0.217297	0.297297	1.62162	0.67027	0.227027	0.281081	0.4	1.96757	0.308108	0.427027	0.243243	0.389189	0.224324	NA		129	swammerdami	0	0
130	CASENT0421555	BLF2780	NA	swammerdami		2220	1120	1340	300	445	2620	1000	390	365	530	3112	442	660	330	565	388	-		swammerdami-BLF2780	-12.4689	49.2422	NA		1.65672	0.835821	0.223881	0.33209	1.95522	0.746269	0.291045	0.272388	0.395522	2.32239	0.329851	0.492537	0.246269	0.421642	0.289552	NA		130	swammerdami	0	0
131	CASENT0421555	BLF2780	NA	swammerdami		2190	1100	1316	322	435	2600	1004	385	355	510	3040	430	635	338	538	375	-		swammerdami-BLF2780	-12.4689	49.2422	NA		1.66413	0.835866	0.244681	0.330547	1.97568	0.762918	0.292553	0.269757	0.387538	2.31003	0.326748	0.482523	0.256839	0.408815	0.284954	NA		131	swammerdami	0	0
132	CASENT0421559	BLF3082	NA	swammerdami		2304	1120	1350	312	455	2688	984	380	352	520	3120	442	640	352	540	380	-		swammerdami-BLF3082	-12.8636	49.2258	NA		1.70667	0.82963	0.231111	0.337037	1.99111	0.728889	0.281481	0.260741	0.385185	2.31111	0.327407	0.474074	0.260741	0.4	0.281481	NA		132	swammerdami	0	0
133	CASENT0421559	BLF3082	NA	swammerdami		2280	1170	1350	325	450	2700	980	415	360	535	3088	450	650	352	555	380	-		swammerdami-BLF3082	-12.8636	49.2258	NA		1.68889	0.866667	0.240741	0.333333	2	0.725926	0.307407	0.266667	0.396296	2.28741	0.333333	0.481481	0.260741	0.411111	0.281481	NA		133	swammerdami	0	0
134	CASENT0421546	BLF3349	NA	swammerdami		2420	1230	1444	368	492	3000	1080	370	390	560	3352	548	712	368	578	398	-		swammerdami-BLF3349	-14.3089	47.9143	NA		1.6759	0.851801	0.254848	0.34072	2.07756	0.747922	0.256233	0.270083	0.387812	2.32133	0.379501	0.493075	0.254848	0.400277	0.275623	NA		134	swammerdami	0	0
135	CASENT0421547	BLF3349	NA	swammerdami		2420	1210	1460	370	490	2848	1056	355	398	570	3260	508	710	370	580	400	-		swammerdami-BLF3349	-14.3089	47.9143	NA		1.65753	0.828767	0.253425	0.335616	1.95068	0.723288	0.243151	0.272603	0.390411	2.23288	0.347945	0.486301	0.253425	0.39726	0.273973	NA		135	swammerdami	0	0
136	CASENT0421548	BLF3388	NA	swammerdami		2140	1080	1250	318	440	2568	960	330	328	485	3000	380	635	300	500	360	-		swammerdami-BLF3388	-14.3089	47.9143	NA		1.712	0.864	0.2544	0.352	2.0544	0.768	0.264	0.2624	0.388	2.4	0.304	0.508	0.24	0.4	0.288	NA		136	swammerdami	0	0
137	CASENT0421551	BLF3388	NA	swammerdami		2190	1116	1310	325	442	2600	976	365	338	530	3080	380	635	332	520	370	-		swammerdami-BLF3388	-14.3089	47.9143	NA		1.67176	0.851908	0.248092	0.337405	1.98473	0.745038	0.278626	0.258015	0.40458	2.35115	0.290076	0.484733	0.253435	0.396947	0.282443	NA		137	swammerdami	0	0
138	CASENT0451462	BLF3519	NA	swammerdami		2080	1040	1216	308	402	2540	1084	405	338	510	2880	422	655	322	498	350	-		swammerdami-BLF3519	-16.3208	46.8107	NA		1.71053	0.855263	0.253289	0.330592	2.08882	0.891447	0.333059	0.277961	0.419408	2.36842	0.347039	0.538651	0.264803	0.409539	0.287829	NA		138	swammerdami	0	0
139	CASENT0451463	BLF3519	NA	swammerdami		2240	1124	1340	338	440	2792	1020	415	398	588	3152	510	670	320	570	372	-		swammerdami-BLF3519	-16.3208	46.8107	NA		1.67164	0.838806	0.252239	0.328358	2.08358	0.761194	0.309701	0.297015	0.438806	2.35224	0.380597	0.5	0.238806	0.425373	0.277612	NA		139	swammerdami	0	0
140	CASENT0484636	BLF3597	NA	swammerdami		2180	1110	1350	325	430	2700	1010	325	370	535	3060	510	680	338	540	372	-		swammerdami-BLF3597	-16.2281	47.1436	NA		1.61481	0.822222	0.240741	0.318519	2	0.748148	0.240741	0.274074	0.396296	2.26667	0.377778	0.503704	0.25037	0.4	0.275556	NA		140	swammerdami	0	0
141	CASENT0484636	BLF3597	NA	swammerdami		2184	1080	1360	325	448	2720	1020	470	368	540	3200	490	700	360	578	380	-		swammerdami-BLF3597	-16.2281	47.1436	NA		1.60588	0.794118	0.238971	0.329412	2	0.75	0.345588	0.270588	0.397059	2.35294	0.360294	0.514706	0.264706	0.425	0.279412	NA		141	swammerdami	0	0
142	CASENT0484723	BLF3662	NA	swammerdami		1830	900	1030	260	365	2220	816	278	280	438	2560	385	590	290	425	300	-		swammerdami-BLF3662	-16.2672	47.0486	NA		1.7767	0.873786	0.252427	0.354369	2.15534	0.792233	0.269903	0.271845	0.425243	2.48544	0.373786	0.572816	0.281553	0.412621	0.291262	NA		142	swammerdami	0	0
143	CASENT0484723	BLF3662	NA	swammerdami		2050	1060	1230	290	400	2488	916	340	318	485	2800	420	605	305	475	338	-		swammerdami-BLF3662	-16.2672	47.0486	NA		1.66667	0.861789	0.235772	0.325203	2.02276	0.744715	0.276423	0.258537	0.394309	2.27642	0.341463	0.49187	0.247967	0.386179	0.274797	NA		143	swammerdami	0	0
144	CASENT0078169	BLF4341	NA	swammerdami		2460	1280	1560	370	500	2880	1096	370	380	555	3360	470	690	345	595	400	-		swammerdami-BLF4341	-19.1322	44.8147	NA		1.57692	0.820513	0.237179	0.320513	1.84615	0.702564	0.237179	0.24359	0.355769	2.15385	0.301282	0.442308	0.221154	0.38141	0.25641	NA		144	swammerdami	0	0
145	CASENT0078170	BLF4341	NA	swammerdami		2400	1220	1444	355	450	3000	1064	380	340	562	3320	490	705	370	570	380	-		swammerdami-BLF4341	-19.1322	44.8147	NA		1.66205	0.844875	0.245845	0.311634	2.07756	0.736842	0.263158	0.235457	0.389197	2.29917	0.339335	0.488227	0.256233	0.394737	0.263158	NA		145	swammerdami	0	0
146	CASENT0079909	BLF4462	NA	swammerdami		2080	1056	1240	312	415	2624	910	275	320	448	2848	400	575	305	475	340	-		swammerdami-BLF4462	-18.7094	44.7182	NA		1.67742	0.851613	0.251613	0.334677	2.11613	0.733871	0.221774	0.258065	0.36129	2.29677	0.322581	0.46371	0.245968	0.383065	0.274194	NA		146	swammerdami	0	0
147	CASENT0079910	BLF4462	NA	swammerdami		1720	840	1036	260	355	2000	784	262	292	470	2360	330	530	280	448	280	-		swammerdami-BLF4462	-18.7094	44.7182	NA		1.66023	0.810811	0.250965	0.342664	1.9305	0.756757	0.252896	0.281853	0.453668	2.27799	0.318533	0.511583	0.27027	0.432432	0.27027	NA		147	swammerdami	0	0
148	CASENT0473814	BLF4605	28	swammerdami		2430	1220	1464	358	492	2952	1144	420	402	610	3380	580	710	382	600	402	-		swammerdami-BLF4605	-20.045	44.6622	NA		1.65984	0.833333	0.244536	0.336066	2.01639	0.781421	0.286885	0.27459	0.416667	2.30874	0.396175	0.484973	0.260929	0.409836	0.27459	NA		148	swammerdami	0	0
149	CASENT0473845	BLF4605	32	swammerdami		2220	1110	1320	305	420	2760	1004	350	310	480	3080	438	650	350	510	360	-		swammerdami-BLF4605	-20.045	44.6622	NA		1.68182	0.840909	0.231061	0.318182	2.09091	0.760606	0.265152	0.234848	0.363636	2.33333	0.331818	0.492424	0.265152	0.386364	0.272727	NA		149	swammerdami	0	0
150	CASENT0001502	BLF4667	NA	swammerdami		2370	1184	1496	342	448	2752	1104	380	398	580	3280	500	720	380	570	390	-		swammerdami-BLF4667	-20.045	44.6622	NA		1.58422	0.791444	0.22861	0.299465	1.83957	0.737968	0.254011	0.266043	0.387701	2.19251	0.334225	0.481283	0.254011	0.381016	0.260695	NA		150	swammerdami	0	0
151	CASENT0001503	BLF4667	NA	swammerdami		2300	1160	1416	320	430	2780	1070	370	375	540	3152	475	660	370	540	370	-		swammerdami-BLF4667	-20.045	44.6622	NA		1.62429	0.819209	0.225989	0.303672	1.96328	0.75565	0.261299	0.264831	0.381356	2.22599	0.335452	0.466102	0.261299	0.381356	0.261299	NA		151	swammerdami	0	0
152	CASENT0429888	BLF4796	NA	swammerdami		2096	1030	1264	282	428	2640	976	360	350	500	2900	440	630	330	545	352	-		swammerdami-BLF4796	-20.7953	44.147	NA		1.65823	0.814873	0.223101	0.338608	2.08861	0.772152	0.28481	0.276899	0.39557	2.2943	0.348101	0.498418	0.261076	0.431171	0.278481	NA		152	swammerdami	0	0
153	CASENT0429889	BLF4796	NA	swammerdami		2100	1030	1300	305	422	2560	960	380	330	485	2920	410	590	330	500	352	-		swammerdami-BLF4796	-20.7953	44.147	NA		1.61538	0.792308	0.234615	0.324615	1.96923	0.738462	0.292308	0.253846	0.373077	2.24615	0.315385	0.453846	0.253846	0.384615	0.270769	NA		153	swammerdami	0	0
154	CASENT0429903	BLF4798	NA	swammerdami		2200	1084	1350	315	428	2680	980	315	340	518	3008	465	620	342	510	392	-		swammerdami-BLF4798	-20.7953	44.147	NA		1.62963	0.802963	0.233333	0.317037	1.98519	0.725926	0.233333	0.251852	0.383704	2.22815	0.344444	0.459259	0.253333	0.377778	0.29037	NA		154	swammerdami	0	0
155	CASENT0429904	BLF4798	NA	swammerdami		2110	1050	1300	300	390	2580	960	330	340	495	2900	410	620	350	505	370	-		swammerdami-BLF4798	-20.7953	44.147	NA		1.62308	0.807692	0.230769	0.3	1.98462	0.738462	0.253846	0.261538	0.380769	2.23077	0.315385	0.476923	0.269231	0.388462	0.284615	NA		155	swammerdami	0	0
156	CASENT0000973	BLF4864	NA	swammerdami		1970	976	1204	302	420	2220	900	345	348	552	2720	350	590	300	520	320	-		swammerdami-BLF4864	-24.8169	46.61	NA		1.63621	0.810631	0.250831	0.348837	1.84385	0.747508	0.286545	0.289037	0.458472	2.25914	0.290698	0.490033	0.249169	0.431894	0.265781	NA		156	swammerdami	0	0
157	CASENT0000974	BLF4864	NA	swammerdami		2130	1040	1340	310	425	2400	960	330	335	550	2860	375	605	320	545	352	-		swammerdami-BLF4864	-24.8169	46.61	NA		1.58955	0.776119	0.231343	0.317164	1.79104	0.716418	0.246269	0.25	0.410448	2.13433	0.279851	0.451493	0.238806	0.406716	0.262687	NA		157	swammerdami	0	0
158	CASENT0001386	BLF4943	NA	swammerdami		2080	1004	1290	310	420	2408	980	345	340	570	2960	390	635	350	555	352	-		swammerdami-BLF4943	-24.93	46.6455	NA		1.6124	0.778295	0.24031	0.325581	1.86667	0.75969	0.267442	0.263566	0.44186	2.29457	0.302326	0.492248	0.271318	0.430233	0.272868	NA		158	swammerdami	0	0
159	CASENT0001386	BLF4943	NA	swammerdami		2080	1010	1320	300	420	2472	944	305	335	532	2920	385	630	350	550	345	-		swammerdami-BLF4943	-24.93	46.6455	NA		1.57576	0.765152	0.227273	0.318182	1.87273	0.715152	0.231061	0.253788	0.40303	2.21212	0.291667	0.477273	0.265152	0.416667	0.261364	NA		159	swammerdami	0	0
160	CASENT0079228	BLF5239	NA	swammerdami		2190	1080	1350	310	440	2600	1000	305	360	548	2928	410	620	352	560	342	-		swammerdami-BLF5239	-24.7583	46.1572	NA		1.62222	0.8	0.22963	0.325926	1.92593	0.740741	0.225926	0.266667	0.405926	2.16889	0.303704	0.459259	0.260741	0.414815	0.253333	NA		160	swammerdami	0	0
161	CASENT0079229	BLF5239	NA	swammerdami		1840	904	1140	260	372	2240	836	282	298	445	2608	332	580	310	460	298	-		swammerdami-BLF5239	-24.7583	46.1572	NA		1.61404	0.792982	0.22807	0.326316	1.96491	0.733333	0.247368	0.261404	0.390351	2.28772	0.291228	0.508772	0.27193	0.403509	0.261404	NA		161	swammerdami	0	0
162	CASENT0101073	swammerdami_ST	NA	swammerdami		2304	1120	1530	348	468	2688	1075	340	370	535	3200	448	690	345	572	410	-		swammerdami-swammerdami_ST	NA	NA	NA		1.50588	0.732026	0.227451	0.305882	1.75686	0.702614	0.222222	0.24183	0.349673	2.0915	0.29281	0.45098	0.22549	0.373856	0.267974	NA		162	swammerdami	0	0
163	CASENT0101074	swammerdami_ST	NA	swammerdami		2260	1090	1524	360	470	2680	1080	360	358	540	3168	462	652	355	552	392	-		swammerdami-swammerdami_ST	NA	NA	NA		1.48294	0.715223	0.23622	0.308399	1.75853	0.708661	0.23622	0.234908	0.354331	2.07874	0.30315	0.427822	0.23294	0.362205	0.257218	NA		163	swammerdami	0	0
164	CASENT0101075	swammerdami_ST	NA	swammerdami		2340	1124	1504	360	482	2688	1100	288	398	600	3288	520	710	405	590	410	-		swammerdami-swammerdami_ST	NA	NA	NA		1.55585	0.74734	0.239362	0.320479	1.78723	0.731383	0.191489	0.264628	0.398936	2.18617	0.345745	0.472074	0.269282	0.392287	0.272606	NA		164	swammerdami	0	0
165	CASENT0101066	var_curta_ST	NA	swammerdami		1920	936	1170	322	415	2240	895	280	350	530	2720	368	580	340	540	352	-		swammerdami-var_curta_ST	-20.3	44.3	NA		1.64103	0.8	0.275214	0.354701	1.91453	0.764957	0.239316	0.299145	0.452991	2.32479	0.31453	0.495726	0.290598	0.461538	0.300855	NA		165	swammerdami	0	0
166	CASENT0101067	var_curta_ST	NA	swammerdami		2364	1184	1480	330	470	2880	1115	380	420	575	3352	545	720	392	620	410	-		swammerdami-var_curta_ST	-20.3	44.3	NA		1.5973	0.8	0.222973	0.317568	1.94595	0.753378	0.256757	0.283784	0.388514	2.26486	0.368243	0.486486	0.264865	0.418919	0.277027	NA		166	swammerdami	0	0
167	CASENT0101089	spinipes_ST	NA	swammerdami		2580	1300	1680	382	510	2832	1155	425	410	630	3400	520	720	380	630	425	-		swammerdami-spinipes_ST	-18.77	45.29	NA		1.53571	0.77381	0.227381	0.303571	1.68571	0.6875	0.252976	0.244048	0.375	2.02381	0.309524	0.428571	0.22619	0.375	0.252976	NA		167	swammerdami	0	0
168	CASENT0101087	clara_ST	NA	swammerdami		2080	1040	1256	310	428	2632	940	420	355	510	2900	420	628	312	515	355	-		swammerdami-clara_ST	-16.03	45.24	NA		1.65605	0.828025	0.246815	0.340764	2.09554	0.748408	0.334395	0.282643	0.406051	2.30892	0.334395	0.5	0.248408	0.410032	0.282643	NA		168	swammerdami	0	0
169	CASENT0002607	BLF6158	NA	swammerdami		2190	1100	1320	362	460	2672	1025	360	350	520	3080	460	675	355	530	372	-		swammerdami-BLF6158	-22.2331	43.3663	NA		1.65909	0.833333	0.274242	0.348485	2.02424	0.776515	0.272727	0.265152	0.393939	2.33333	0.348485	0.511364	0.268939	0.401515	0.281818	NA		169	swammerdami	0	0
170	CASENT0208724	BLF25995	NA	swammerdami		2460	1184	1660	388	522	2800	1155	365	418	640	3400	515	665	375	620	405	NA		swammerdami-BLF25995	NA	NA	NA		1.48193	0.713253	0.233735	0.314458	1.68675	0.695783	0.21988	0.251807	0.385542	2.04819	0.310241	0.400602	0.225904	0.373494	0.243976	NA		170	swammerdami	0	0
171	CASENT0208717	BLF25996	NA	swammerdami		2176	1060	1380	318	442	2568	1040	335	360	580	3060	480	628	352	590	352	NA		swammerdami-BLF25996	NA	NA	NA		1.57681	0.768116	0.230435	0.32029	1.86087	0.753623	0.242754	0.26087	0.42029	2.21739	0.347826	0.455072	0.255072	0.427536	0.255072	NA		171	swammerdami	0	0
172	NA	BLF25960	NA	swammerdami		2360	1150	1560	380	525	2672	1130	385	405	622	3280	505	670	350	610	385	NA		swammerdami-BLF25960	NA	NA	NA		1.51282	0.737179	0.24359	0.336538	1.71282	0.724359	0.246795	0.259615	0.398718	2.10256	0.323718	0.429487	0.224359	0.391026	0.246795	NA		172	swammerdami	0	0
173	NA	BLF25943	NA	swammerdami		2184	1044	1440	330	420	2560	1025	340	350	540	3020	445	625	355	542	375	NA		swammerdami-BLF25943	NA	NA	NA		1.51667	0.725	0.229167	0.291667	1.77778	0.711806	0.236111	0.243056	0.375	2.09722	0.309028	0.434028	0.246528	0.376389	0.260417	NA		173	swammerdami	0	0
174	CASENT0210947	BLF25203	NA	makay		1964	1020	1136	272	370	2580	915	270	330	415	2720	260	630	302	495	310	-		makay-BLF25203	-21.2184	45.3106	NA		1.72887	0.897887	0.239437	0.325704	2.27113	0.805458	0.237676	0.290493	0.365317	2.39437	0.228873	0.554577	0.265845	0.435739	0.272887	NA		174	makay	0	0
175	CASENT0208632	BLF25202	NA	makay		2070	1064	1230	305	398	2640	965	305	370	550	2900	280	630	342	530	320	-		makay-BLF25202	-21.2184	45.3106	NA		1.68293	0.865041	0.247967	0.323577	2.14634	0.784553	0.247967	0.300813	0.447154	2.35772	0.227642	0.512195	0.278049	0.430894	0.260163	NA		175	makay	0	0
176	CASENT0205704	BLF25750	NA	makay		1800	920	1036	260	348	2328	790	250	310	475	2440	220	570	300	470	290	-		makay-BLF25750	-21.2586	45.1641	NA		1.73745	0.888031	0.250965	0.335907	2.2471	0.762548	0.241313	0.299228	0.458494	2.35521	0.212355	0.550193	0.289575	0.453668	0.279923	NA		176	makay	0	0
[truncated: 6 more columns]
