# Supplementary material for: Taxonomic revision of the Malagasy Aphaenogaster swammerdami group (Hymenoptera: Formicidae)
Source: PeerJ. 2021 Mar 2;9:e10900. doi: 10.7717/peerj.10900 (PMC7934650; doi:10.7717/peerj.10900)
Supplement: Supplemental Information 2 [file peerj-09-10900-s002.xls]

## Sheet: Appendix_01
	voucher ID	BOLD	GenBank	species (COI data)	Locality	included in the phylogeny
1	ASANA163-06	NA	KC335803.1	Cephalotes_texanus		YES
2	GBMIN75074-17	NA	KY426518.1	Tapinoma_magnum		YES
3	CASENT0107561-D02	JDWAM513-05	MT670162	D. gonacantha	Antsiranana	YES
4	CASENT0107567-D02	ASAMF391-06	MT670173	D. gonacantha	Antsiranana	YES
5	CASENT0497022-D01	ASAMF629-06	MT670151	D. gonacantha	Toamasina	YES
6	CASENT0495516	ASIMA188-08	MT670123	D. gonacantha	Toamasina	YES
7	CASENT0049889-D01	ASANQ587-09	MT670154	D. gonacantha	Toamasina	YES
8	CASENT0049808-D01	ASAMF229-06	MT670121	D. gonacantha	Toamasina	YES
9	CASENT0048677-D01	ASANQ584-09	GU710739	D. gonacantha	Toamasina	YES
10	CASENT0495536-D01	ASANQ931-09	MT670159	D. gonacantha	Toamasina	YES
11	CASENT0107368-D01	ASANQ718-09	MT670117	D. gonacantha	Antsiranana	YES
12	CASENT0497021-D01	ASANQ937-09	GU710737	D. gonacantha	Toamasina	NO
13	CASENT0497024-D01	ASANQ938-09	GU710738	D. gonacantha	Toamasina	YES
14	CASENT0505285	JDWAM006-04	MT670137	D. swammerdami	Antsiranana	YES
15	CASENT0505287	JDWAM008-04	MT670125	D. swammerdami	Toliara	YES
16	CASENT0505289	JDWAM010-04	MT670157	D. swammerdami	Mahajanga	YES
17	CASENT0505291	JDWAM012-04	MT670143	D. swammerdami	Toliara	YES
18	CASENT0107510-D01	JDWAM484-05	MT670115	D. swammerdami	Mahajanga	YES
19	CASENT0107511-D01	JDWAM485-05	MT670131	D. swammerdami	Mahajanga	YES
20	CASENT0107512-D01	JDWAM486-05	MT670138	D. swammerdami	Mahajanga	NO
21	CASENT0107514-D01	JDWAM488-05	MT670181	D. swammerdami	Mahajanga	NO
22	CASENT0107556-D01	JDWAM508-05	MT670148	D. swammerdami	Antsiranana	YES
23	CASENT0107558-D01	JDWAM510-05	MT670146	D. swammerdami	Antsiranana	YES
24	CASENT0107560-D01	JDWAM511-05	MT670128	D. swammerdami	Antsiranana	YES
25	CASENT0107580-D01	JDWAM530-05	MT670145	D. swammerdami	Toamasina	YES
26	CASENT0107658-D01	JDWAM630-05	DQ176096	D. swammerdami	Antsiranana	YES
27	CASENT0057196-D01	ASAM810-05	MT670167	D. swammerdami	Toliara	YES
28	CASENT0051514-D01	ASAMF240-06	MT670140	D. swammerdami	Toliara	YES
29	CASENT0057187-D02	ASAMF267-06	MT670126	D. swammerdami	Toliara	YES
30	CASENT0057188-D02	ASAMF268-06	MT670116	D. swammerdami	Toliara	YES
31	CASENT0057189-D02	ASAMF269-06	MT670141	D. swammerdami	Toliara	YES
32	CASENT0057190-D02	ASAMF270-06	MT670135	D. swammerdami	Toliara	NO
33	CASENT0057191-D02	ASAMF271-06	MT670172	D. swammerdami	Toliara	NO
34	CASENT0057193-D02	ASAMF273-06	MT670134	D. swammerdami	Toliara	NO
35	CASENT0057194-D02	ASAMF274-06	MT670144	D. swammerdami	Toliara	YES
36	CASENT0057197-D02	ASAMF276-06	MT670112	D. swammerdami	Toliara	NO
37	CASENT0073401-D01	ASAMF288-06	MT670129	D. swammerdami	Mahajanga	YES
38	CASENT0107509-D02	ASAMF377-06	MT670111	D. swammerdami	Mahajanga	YES
39	CASENT0107513-D02	ASAMF381-06	MT670120	D. swammerdami	Mahajanga	YES
40	CASENT0107578-D02	ASAMF392-06	MT670163	D. swammerdami	Toamasina	YES
41	CASENT0491154-D01	ASAMF600-06	MT670164	D. swammerdami	Fianarantsoa	YES
42	CASENT0120412-D01	ASAMZ050-07	MT670118	D. swammerdami	Fianarantsoa	YES
43	CASENT0120649-D01	ASAMZ087-07	MT670179	D. swammerdami	Toliara	YES
44	CASENT0123046-D01	ASAMZ234-07	MT670168	D. swammerdami	Antananarivo	YES
45	CASENT0124851-D01	ASAMZ283-07	MT670119	D. swammerdami	Mahajanga	YES
46	CASENT0000520	ASIMA002-08	MT670160	D. swammerdami	Toliara	YES
47	CASENT0012693	ASIMA009-08	MT670166	D. swammerdami	Antananarivo	YES
48	CASENT0121703	ASIMA083-08	MT670161	D. swammerdami	Antananarivo	YES
49	CASENT0122373	ASIMA089-08	MT670124	D. swammerdami	Antananarivo	YES
50	CASENT0128325	ASIMA110-08	MT670171	D. swammerdami	Antananarivo	YES
51	CASENT0424263	ASIMA148-08	MT670139	D. swammerdami	Toliara	YES
52	CASENT0475493	ASIMA172-08	MT670155	D. swammerdami	Toliara	YES
53	CASENT0487645	ASIMA179-08	MT670136	D. swammerdami	Antsiranana	YES
54	CASENT0489264	ASIMA180-08	MT670165	D. swammerdami	Mahajanga	YES
55	CASENT0156492-D01	ASANG869-10	JN287664	D. swammerdami	Mahajanga	YES
56	CASENT0156734-D01	ASANG982-10	JN287693	D. swammerdami	Mahajanga	NO
57	CASENT0204505-D01	ASANJ227-11	MT670158	D. swammerdami	Toliara	YES
58	CASENT0152832-D01	ASANI098-11	MT670177	D. swammerdami	Mahajanga	NO
59	CASENT0210947-D01	ASANJ873-11	MT670156	D. makay	Toliara	YES
60	CASENT0205704-D01	ASANJ310-11	MT670114	D. makay	Toliara	YES
61	CASENT0505292	JDWAM013-04	MT670152	D. blessleri	Toamasina	YES
62	CASENT0505293	JDWAM014-04	MT670133	D. blessleri	Toamasina	YES
63	CASENT0048942-D01	ASAMF219-06	MT670142	D. blessleri	Toamasina	YES
64	CASENT0065562-D01	ASAMF770-06	MT670175	D. blessleri	Toamasina	YES
65	CASENT0066845-D01	ASAMF806-06	MT670174	D. blessleri	Toamasina	YES
66	CASENT0066999-D01	ASAMV235-06	MT670130	D. blessleri	Toamasina	YES
67	CASENT0063309-D01	ASAMX284-06	MT670182	D. blessleri	Toamasina	NO
68	CASENT0067574-D01	ASAMX449-06	MT670127	D. blessleri	Toamasina	YES
69	CASENT0067682-D01	ASAMX471-06	MT670153	D. blessleri	Toamasina	NO
70	CASENT0006625	ASIMA005-08	MT670113	D. blessleri	Toamasina	YES
71	CASENT0175129	ASIMA136-08	MT670176	D. blessleri	Toamasina	YES
72	CASENT0495103	ASIMA187-08	MT670180	D. blessleri	Toamasina	YES
73	CASENT0100523	ASIMA065-08	MT670169	D. blessleri	Toamasina	YES
74	CASENT0059359-D01	ASAM3003-05	MT670132	D. sahafina	Fianarantsoa	YES
75	CASENT0060017-D01	ASAM3022-05	MT670122	D. sahafina	Fianarantsoa	YES
76	CASENT0060018-D01	ASAM3023-05	MT670178	D. sahafina	Fianarantsoa	NO
77	CASENT0132231	ASIMA112-08	MT670150	D. sahafina	Toamasina	YES
78	CASENT0132239	ASIMA113-08	MT670149	D. sahafina	Toamasina	YES
79	CASENT0134559	ASIMA123-08	MT670170	D. sahafina	Toamasina	YES
80	CASENT0060152	ASIMA045-08	MT670147	D. sahafina	Fianarantsoa	YES
81	CASENT0012696-D01	ASANQ493-09	HQ925397	D. sahafina	Toamasina	YES
82	CASENT0060039-D01	ASANQ609-09	GU710729	D. sahafina	Fianarantsoa	NO
83	CASENT0067120-D03	ASANQ618-09	GU710736	D. sahafina	Toamasina	YES
84	CASENT0067121-D03	ASANQ619-09	GU710734	D. sahafina	Toamasina	YES
85	CASENT0067122-D02	ASANQ620-09	GU710735	D. sahafina	Toamasina	NO
86	CASENT0067123-D02	ASANQ621-09	GU710731	D. sahafina	Toamasina	YES
87	CASENT0067124-D02	ASANQ622-09	GU710733	D. sahafina	Toamasina	NO
88	CASENT0067487-D02	ASANQ624-09	GU710732	D. sahafina	Toamasina	NO
89	CASENT0132230-D01	ASANQ738-09	GU710730	D. sahafina	Toamasina	YES
90	CASENT0132233-D01	ASANQ739-09	GU710727	D. sahafina	Toamasina	YES
91	CASENT0012695-D02	ASANR502-09	GU711166	D. sahafina	Toamasina	NO
